# Supplementary material for: New Cysteine-Rich Ice-Binding Protein Secreted from Antarctic Microalga, Chloromonas sp
Source: PubMed Central journal article supplement (PMC4838330; doi:10.1371/journal.pone.0154056), 2016-04-20
Supplement: pone.0154056.s001.pdf [file pone.0154056.s001.pdf]

|     |     |     |     |     |     |     |     |     |     |     |     |     |     |     |     |     |     |     |     |      |
|-----|-----|-----|-----|-----|-----|-----|-----|-----|-----|-----|-----|-----|-----|-----|-----|-----|-----|-----|-----|------|
| ATG | CCT | AGC | TCT | TCA | ATG | AAG | CTG | TTT | GCA | GCA | CTA | CTA | GTC | GCC | TGC | CTG | GCT | CAG | ACC | 60   |
| M   | P   | S   | S   | S   | M   | K   | L   | F   | A   | A   | L   | L   | V   | A   | C   | L   | A   | Q   | T   |      |
| AGC | ATG | GCG | GCC | ATC | GTT | GTG | TGC | AAG | ATG | GAT | GCC | CAG | GAT | GGA | GAC | ACG | CTT | ACT | GCC | 120  |
| S   | M   | A   | A   | I   | V   | V   | C   | K   | M   | D   | A   | Q   | D   | G   | D   | T   | L   | T   | A   |      |
| GCC | TGC | AGC | GTG | GGT | GTC | TCA | GGT | CAA | CCC | ATC | TCT | CTT | GTG | GGG | CCA | GGA | TCT | GGC | CAG | 180  |
| A   | C   | S   | V   | G   | V   | S   | G   | Q   | P   | I   | S   | L   | V   | G   | P   | G   | S   | G   | Q   |      |
| CAG | CAG | CTG | ACT | GGA | TCG | CAA | GTC | TCA | TAC | ACC | CTG | GAT | GTG | AAT | GCC | AGA | TCA | ACA | CTG | 240  |
| Q   | Q   | L   | T   | G   | S   | Q   | V   | S   | Y   | T   | L   | D   | V   | N   | A   | R   | S   | T   | L   |      |
| TTC | GAG | TGC | GCC | AGT | GAG | GAT | GAC | CTG | CTC | ATC | ATT | GAC | TCA | TCC | CAG | TAC | AGC | AGC | CAG | 300  |
| F   | E   | C   | A   | S   | E   | D   | D   | L   | L   | I   | I   | D   | S   | S   | Q   | Y   | S   | S   | Q   |      |
| ACC | CTC | AAC | AAC | TGC | GAA | CCC | CCT | CTG | CTT | GAG | TTG | CGC | GGG | TGC | AGC | AAT | GCC | ATC | CTC | 360  |
| T   | L   | N   | N   | C   | E   | P   | P   | L   | L   | E   | L   | R   | G   | C   | S   | N   | A   | I   | L   |      |
| AGC | AAC | AAC | ACC | TTC | ATT | AGC | ATC | ACA | CGG | AGC | ACT | GCC | CAG | CCT | GGG | TGC | ACC | ATC | AGC | 420  |
| S   | N   | N   | T   | F   | I   | S   | I   | T   | R   | S   | T   | A   | Q   | P   | G   | C   | T   | I   | S   |      |
| AAG | TAC | GGC | CCA | TGC | GTG | GCC | GTA | GTG | GGC | GCT | GCC | AGC | CAA | GAG | ACG | GAC | TGG | TCT | TTC | 480  |
| K   | Y   | G   | P   | C   | V   | A   | V   | V   | G   | A   | A   | S   | Q   | E   | T   | D   | W   | S   | F   |      |
| TCT | TCA | CTC | GCC | AAC | ACC | TTC | ACC | TCC | ACA | ATC | TGC | TCA | TCT | ATT | TCA | GCA | ACC | TCC | GGC | 540  |
| S   | S   | L   | A   | N   | T   | F   | T   | S   | T   | I   | C   | S   | S   | I   | S   | A   | T   | S   | G   |      |
| CGC | CTA | GGT | GGT | GCA | TTT | GCA | TTC | GAG | CAC | AAT | GAC | TCA | CCA | GGC | GCC | ATG | TCA | GCA | GTC | 600  |
| R   | L   | G   | G   | A   | F   | A   | F   | E   | H   | N   | D   | S   | P   | G   | A   | M   | S   | A   | V   |      |
| GTC | AAG | GGA | TCT | ACC | TTC | ACC | AGC | ACC | GCT | TGT | GAC | TTT | GGA | GGA | GCC | ATT | CAC | AGC | GCC | 660  |
| V   | K   | G   | S   | T   | F   | T   | S   | T   | A   | C   | D   | F   | G   | G   | A   | I   | H   | S   | A   |      |
| AAT | GCA | TCC | CTT | ACT | CTA | ACC | GAC | TCA | ACA | TTC | ACG | GGC | ACT | TTG | GCA | GTG | GAT | GGA | GGC | 720  |
| N   | A   | S   | L   | T   | L   | T   | D   | S   | T   | F   | T   | G   | T   | L   | A   | V   | D   | G   | G   |      |
| GCT | GTG | CAG | TTC | GTC | GGC | ACC | AAT | GCC | ACT | GTT | GCT | CCT | ATC | CAG | AAG | CTT | CAA | GTG | AAG | 780  |
| A   | V   | Q   | F   | V   | G   | T   | N   | A   | T   | V   | A   | P   | I   | Q   | K   | L   | Q   | V   | K   |      |
| TCA | TCT | ACC | TTC | ACT | TCA | AAC | ACG | GCT | GTG | ACC | ACT | GGC | GGA | ATC | ATC | CAA | GTG | ACA | GGG | 840  |
| S   | S   | T   | F   | T   | S   | N   | T   | A   | V   | T   | T   | G   | G   | I   | I   | Q   | V   | T   | G   |      |
| GGT | GCT | GTG | TCC | ATT | GAT | GGC | TCA | ACG | TTC | ACC | AAC | GGC | GAG | GCC | CAG | ATT | GGA | CAG | TGT | 900  |
| G   | A   | V   | S   | I   | D   | G   | S   | T   | F   | T   | N   | G   | E   | A   | Q   | I   | G   | Q   | C   |      |
| GTG | TGG | CTT | GAT | AAG | TGC | GAG | AGC | TAC | ACC | GAG | AAT | CAG | ATC | ACA | GGC | AAC | ACC | TGG | ACA | 960  |
| V   | W   | L   | D   | K   | C   | E   | S   | Y   | T   | E   | N   | Q   | I   | T   | G   | N   | T   | W   | T   |      |
| GGC | TGT | GCC | AAA | CCC | GAG | AGC | CCC | CCA | ATC | TCA | TGG | TGC | AAG | GCT | CAT | GAT | GGC | AAC | AAT | 1020 |
| G   | C   | A   | K   | P   | E   | S   | P   | P   | I   | S   | W   | C   | K   | A   | H   | D   | G   | N   | N   |      |
| TGG | ACC | ACC | TGC | GGA | ATG | GAA | GGG | CCC | AGG | GAG | TGC | TAC | TAA |     |     |     |     |     |     | 1062 |
| W   | T   | T   | C   | G   | M   | E   | G   | P   | R   | E   | C   | Y   | *   |     |     |     |     |     |     |      |
