# Supplementary material for: New Cysteine-Rich Ice-Binding Protein Secreted from Antarctic Microalga, Chloromonas sp
Source: PubMed Central journal article supplement (PMC4838330; doi:10.1371/journal.pone.0154056), 2016-04-20
Supplement: pone.0154056.s002.pdf [file pone.0154056.s002.pdf]

```

Chloro_IBP      --MPSSSMK- ---LFAALLV ACLAQTSMAA IVVCKMDAQD GDTLTAACSV GVSGQPISLV
Chlamy_IBP_1   --.....- ---.....I ..M..... ..N..... ..P.E
Chlamy_IBP_2   --.STT.I.W ATP.L-. .S...G.S ...T.N.I. TI.AG... ..N.AVV...
Chlamy_IBP_3   --.T.TDSS- ILTIL...M. VS.T.A.-. K.T.T.N.IS .RQVGGT... -FG..VT.FI
Chlamy_IBP_4   MSATTTT.W VTP.L..... .S.T..... ..I..... .QI..G..T. ....AV....

Chloro_IBP      GPGSGQQQLT GSQVSYTLDV NARSTLFECA SEDDLLIIDS SQYSSQTLNN CEPPLLELRG
Chlamy_IBP_1   .....P...P .....A ..N.....G D....V... ..
Chlamy_IBP_2   ...T.P...A ..E..... ..T.G.....
Chlamy_IBP_3   .T.T.SFP.P .TDIT..I.A .G..M..... .QS.I.TV... .V..G..I... ..I.F..
Chlamy_IBP_4   ...A.P.L.N D.SI..... ..D.....

Chloro_IBP      CSNAILSNNNT FISITRSTAQ P-GCTISKYG PCVAVVGAAS QETDWSFSSL ANFTSTICS
Chlamy_IBP_1   .....T. ....-E..... ..M.....T .....A
Chlamy_IBP_2   ...VF... .T..... -E..... ..I..... .S..... E.....A.A
Chlamy_IBP_3   ...AVI.TK .TD...N.. .DN.EV.QF. ..I...SV. .TE..T..N ET...T..V.
Chlamy_IBP_4   .....H.. .T..... -A..... ..I..... .VA..... D.....SG.A

Chloro_IBP      SISATSG-RL GGAFAFEHND SPGAMSAVVK GSTFTSTACD FGGAIHSANA SLTLTDSTFT
Chlamy_IBP_1   .....-V .....R.. ....T....
Chlamy_IBP_2   ..A....-.. ...L.LVR.G A.....LI. K.....M.. .....V .....QS.V..
Chlamy_IBP_3   .LQPSAVS.. ...I.VLKK. .V..VQ.... .T...T.S.. L.....T.GV ...AM.T...
Chlamy_IBP_4   ..A....-.. ...L.LVRA. .G.....FIQ K.....Q.. .....V .....QS....

Chloro_IBP      GTLAVDGGAV QFVGTNATVA PIQKLQVRSS TFTSNTAVTT GGIIQVTGGA VSIDGSTFTN
Chlamy_IBP_1   ..... L..... ..Q.S.... ..S..... ..M.E.A... ..D.....
Chlamy_IBP_2   S.....G. D.RAADP.AV .T.A.V.DRT ...P..... ..A...R..V .T.KD....
Chlamy_IBP_3   TNS....SI H.T.----. ADAQEV.QRC ..TQK.TAN ..S.A.Y..N .T.TD.D.SE
Chlamy_IBP_4   SS.....N. IAASPLAV .T.T.L.DR. ...AP..... ..A.Q.N..L LT.KD....

Chloro_IBP      GEAQIGQCWV LDKCESYTEN QITGNTWTGC AKPESPPISW CKAHDGNNWT TCGMEGPREC
Chlamy_IBP_1   .D.K..K... .....D K..N..... .....K.. .....
Chlamy_IBP_2   ..SL..E... .AN.G....S E.V..... ..RG..... .RE....D.A .....V..
Chlamy_IBP_3   .R.TQ.A... .NQ.A...KD ..VN.K..D. STQFT---TL .CPAN..V.S S..IA..A..
Chlamy_IBP_4   .A.LN.K... V.I.QT...T E.VR..... .T..G..... .....Q.. S.....Y..

Chloro_IBP      Y----- -
Chlamy_IBP_1   .----- -
Chlamy_IBP_2   .----- -
Chlamy_IBP_3   SEAVPPALCP A
Chlamy_IBP_4   .----- -

```

371
