# Supplementary material for: New Cysteine-Rich Ice-Binding Protein Secreted from Antarctic Microalga, Chloromonas sp
Source: PubMed Central journal article supplement (PMC4838330; doi:10.1371/journal.pone.0154056), 2016-04-20

|                                                                                    |     |
|------------------------------------------------------------------------------------|-----|
| MPSSSMKLF AALLVACLAQTSMAAIVVCKMDAQDGTLTAAACSVGVSGQPISLVGPGSGQQQLTGSQVSYTLDVNARSTL  | 80  |
| FECASEDDLIIIDSSQYSSQTLNNCPEPLLELRGCSNAILSNTFISITRSTAQPGCTISKYGPCVAVVGAASQETDWSF    | 160 |
| SSLANTFTSTICSSISATSGRLGGAF AFEHNDSPGAMSAVVKGSFTTSTACDFGGAIHSANASLTLTDSTFTGT LAVDGG | 240 |
| AVQFVGT NATVAPIQKLQVKSSTFTSNTAVTTGGIIQVTGGAVSIDGSTFTNGEAQIGQCVWLDKCESYTENQITGNTWT  | 320 |
| GCAKPESPPI SWCKAHDGNNWTT CGMEGPRECY                                                |     |
| .....                                                                              | 80  |
| ..... N .....                                                                      | 160 |
| .....                                                                              | 240 |
| ..... N .....                                                                      | 320 |
| .....                                                                              | 400 |

NetNGlyc 1.0: predicted N-glycosylation sites in Sequence

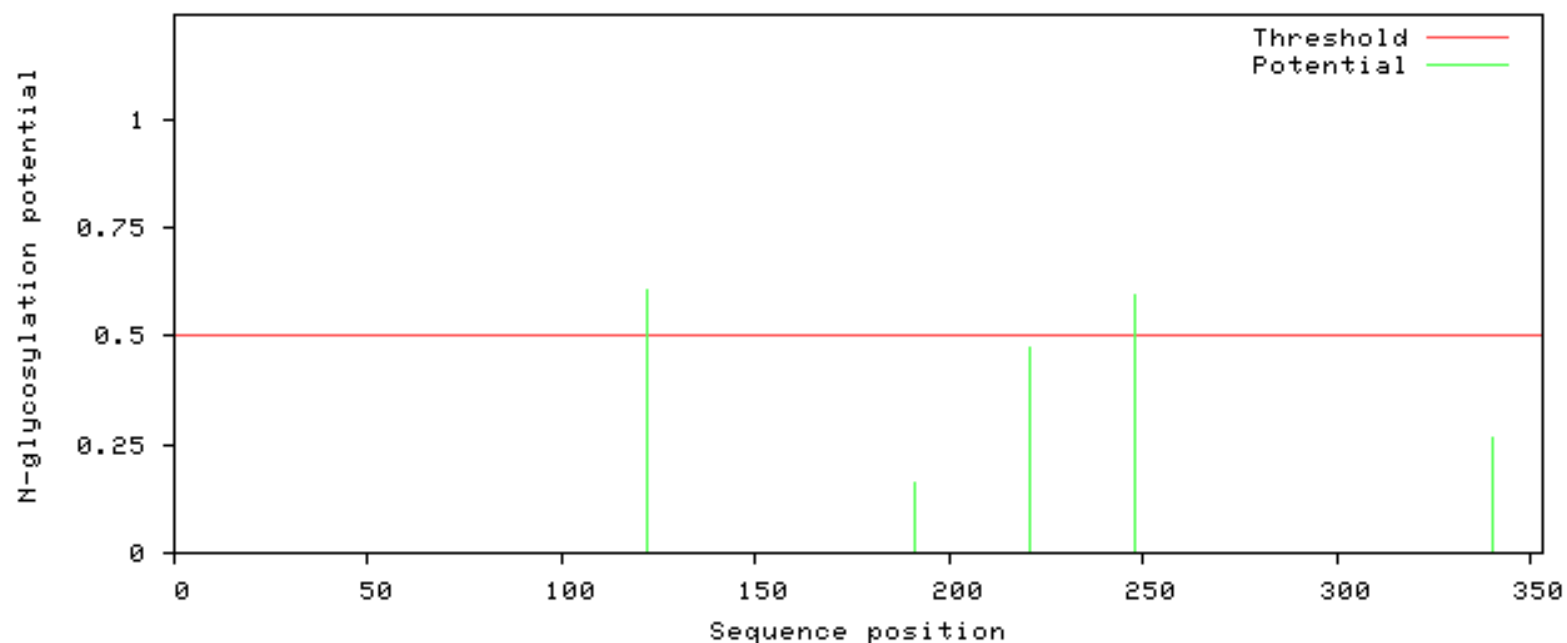

Supplement: pone.0154056.s003.pdf [file pone.0154056.s003.pdf]
