# Supplementary material for: New Cysteine-Rich Ice-Binding Protein Secreted from Antarctic Microalga, Chloromonas sp
Source: PubMed Central journal article supplement (PMC4838330; doi:10.1371/journal.pone.0154056), 2016-04-20

### CD Spectrum of Chloro IBP (including Trx Tag) at 25 °C

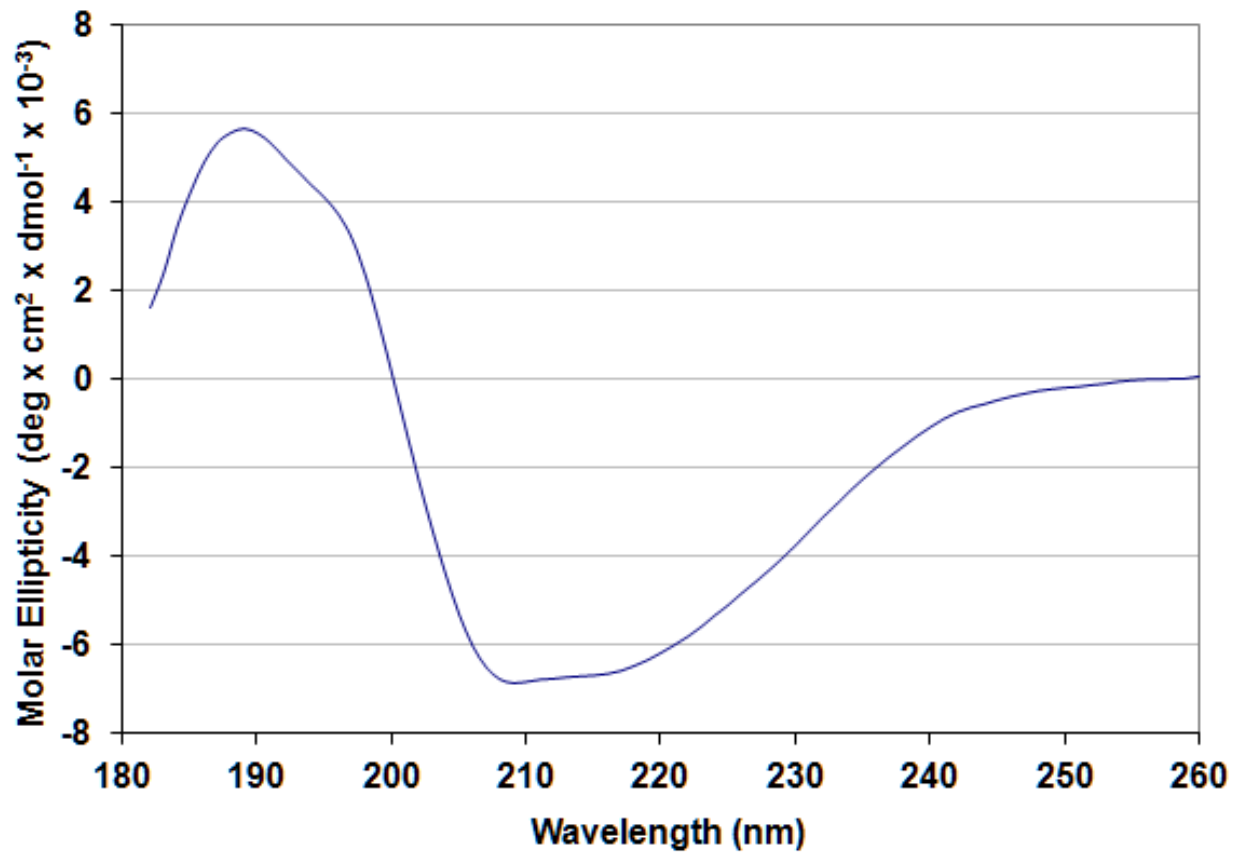

Supplement: pone.0154056.s006.pdf [file pone.0154056.s006.pdf]
