# Supplementary material for: New Cysteine-Rich Ice-Binding Protein Secreted from Antarctic Microalga, Chloromonas sp
Source: PubMed Central journal article supplement (PMC4838330; doi:10.1371/journal.pone.0154056), 2016-04-20

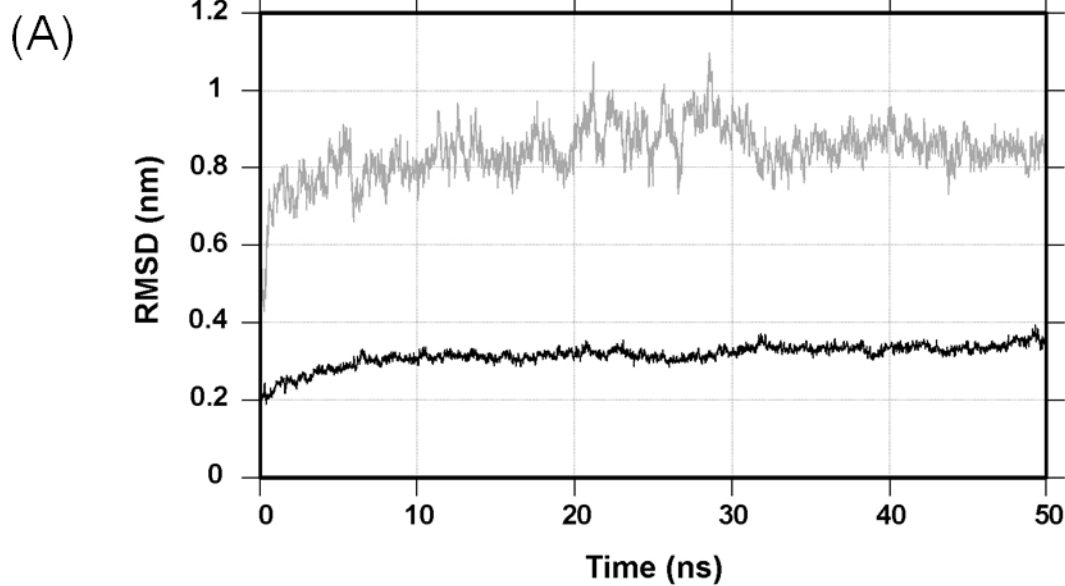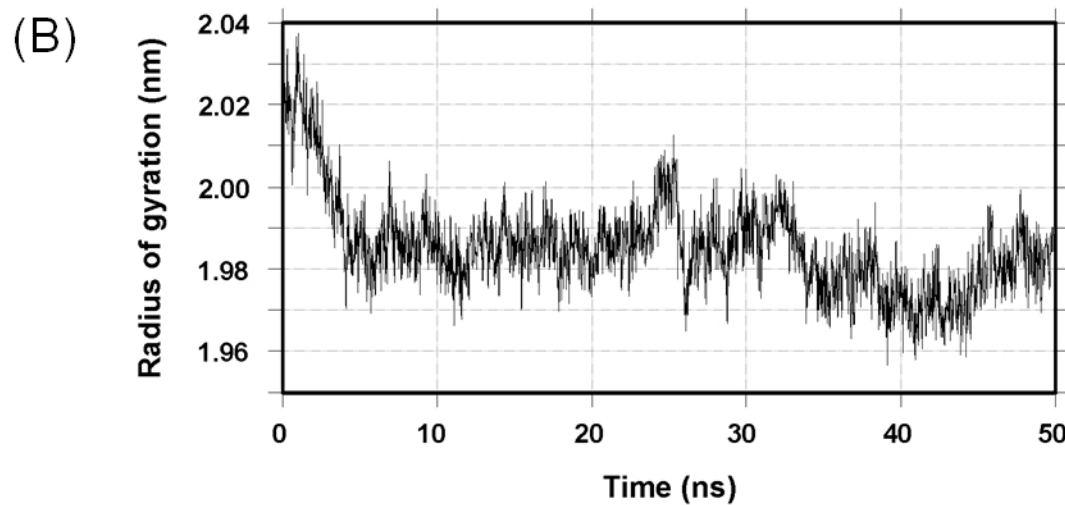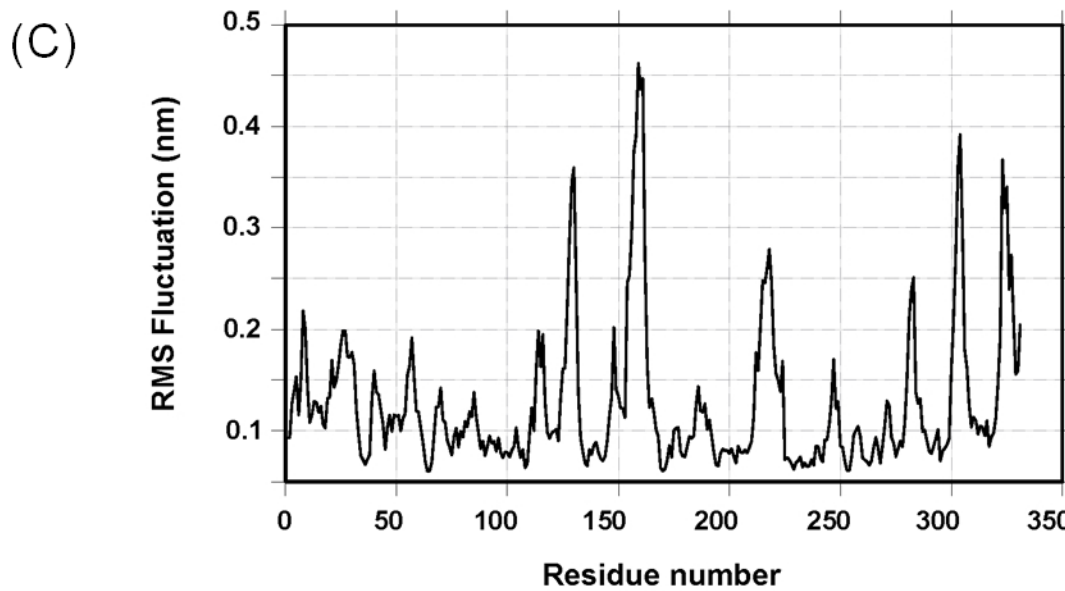

Supplement: pone.0154056.s007.pdf [file pone.0154056.s007.pdf]
