# Supplementary material for: New Cysteine-Rich Ice-Binding Protein Secreted from Antarctic Microalga, Chloromonas sp
Source: PubMed Central journal article supplement (PMC4838330; doi:10.1371/journal.pone.0154056), 2016-04-20
Supplement: pone.0154056.s008.pdf [file pone.0154056.s008.pdf]

**5.0 mg/ml**

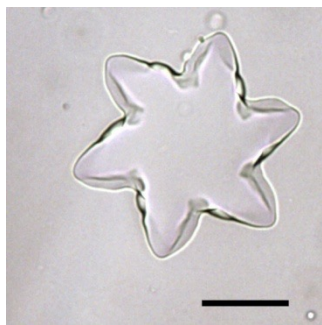

T166Y

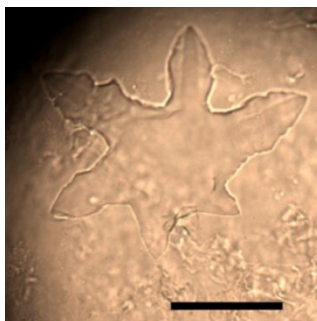

T205Y

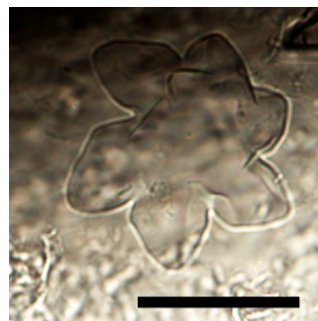

T230Y

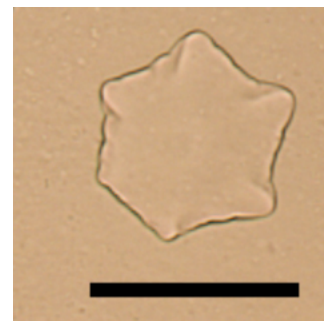

ChloroIBP

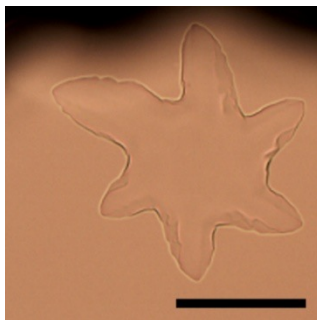

T263Y

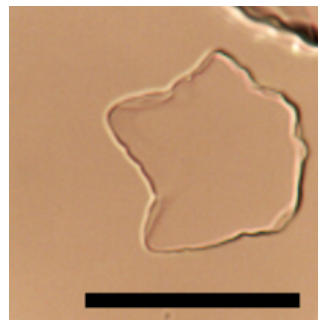

T289Y

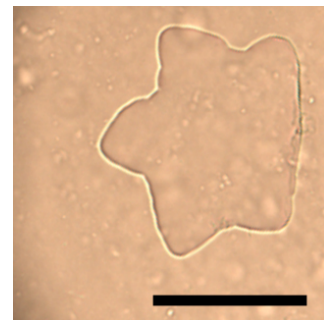

T318Y

**2.0 mg/ml**

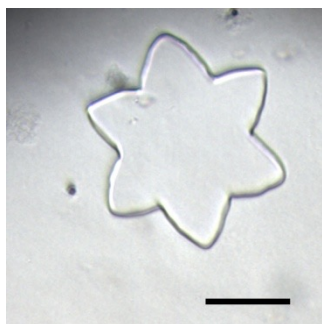

ChloroIBP

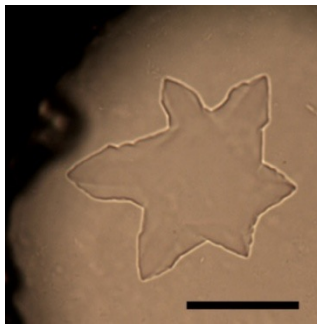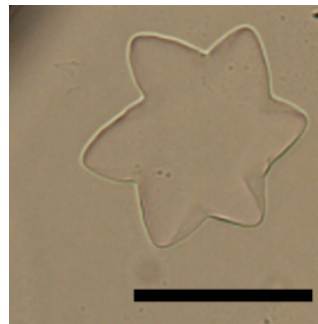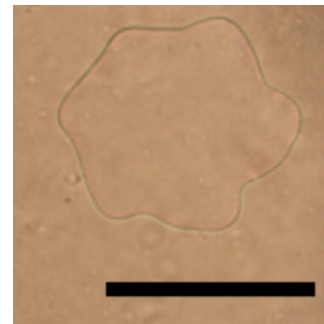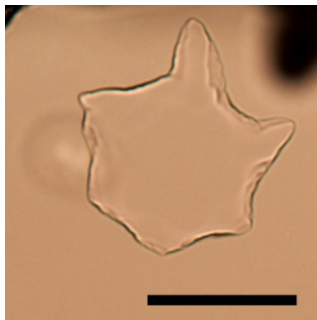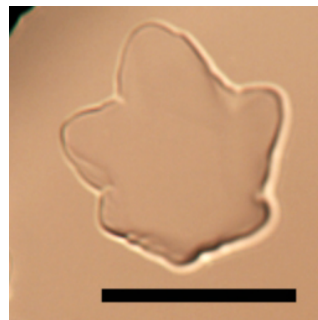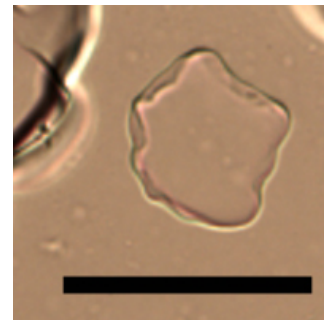

**1.0 mg/ml**

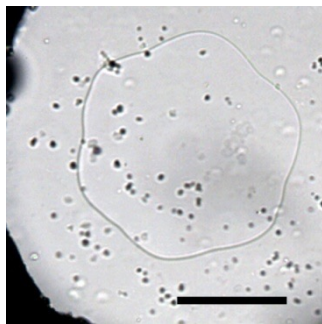

ChloroIBP

T166Y

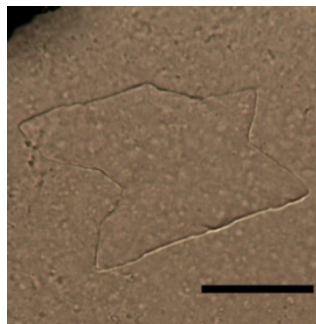

T205Y

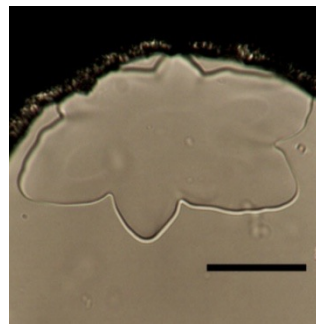

T230Y

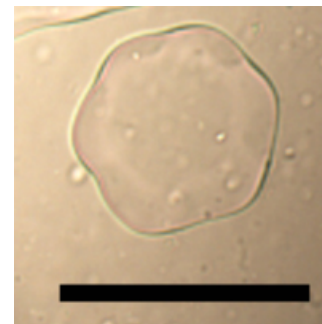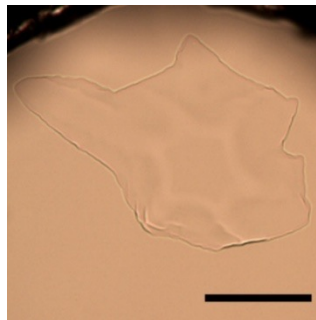

T263Y

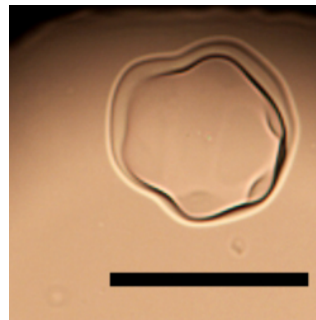

T289Y

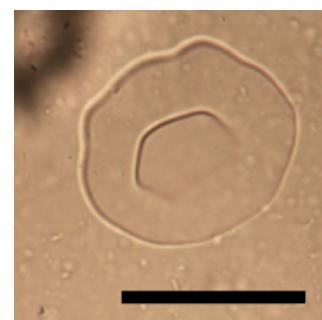

T318Y

**0.5 mg/ml**

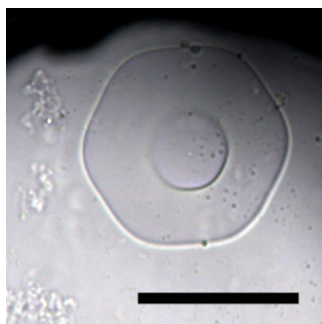

ChloroIBP

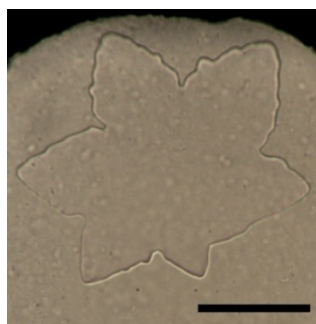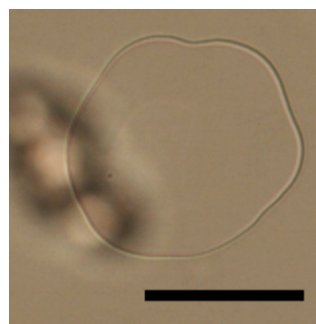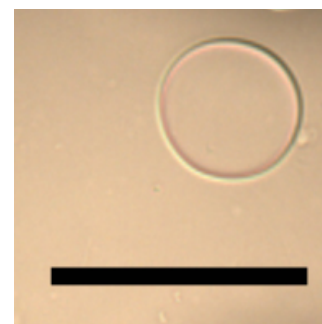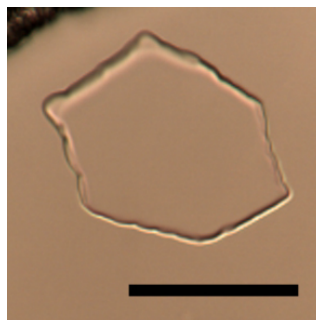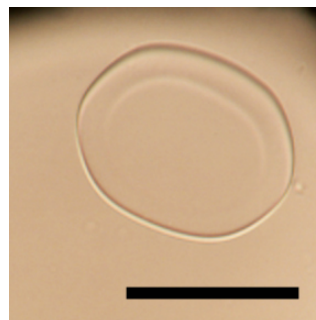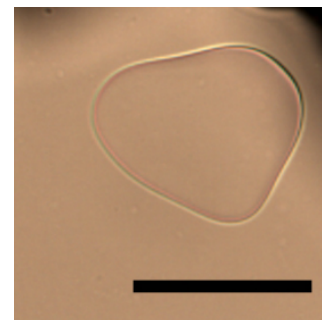



**0.25 mg/ml**

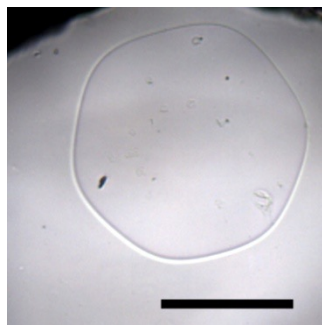

ChloroIBP

T166Y

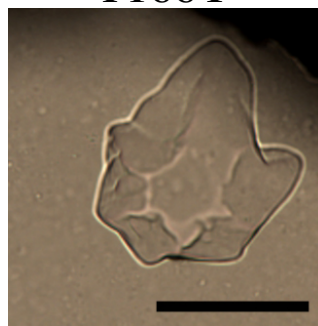

T205Y

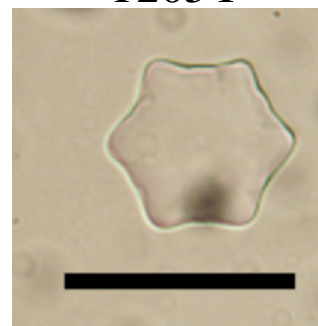

T230Y

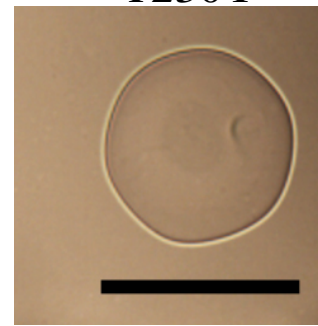

**0.13 mg/ml**

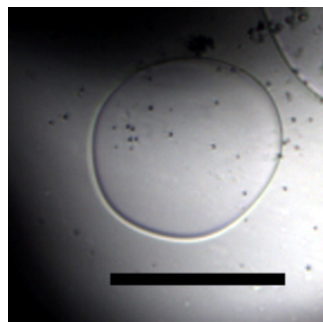

ChloroIBP

T263Y

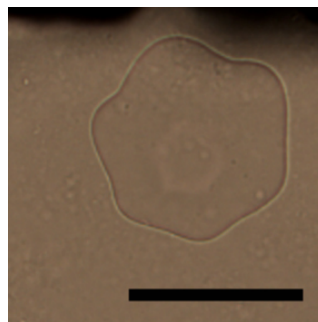

T289Y

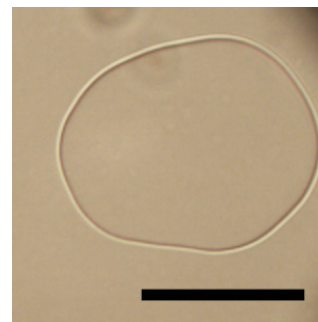

T318Y

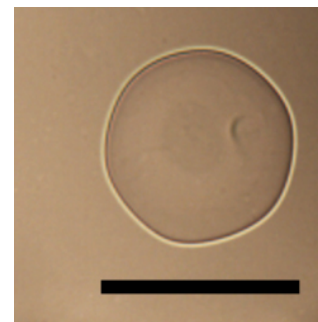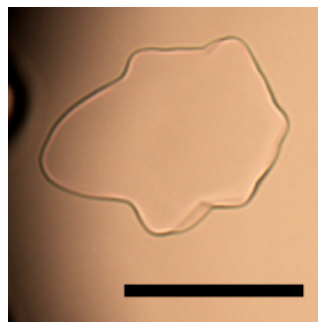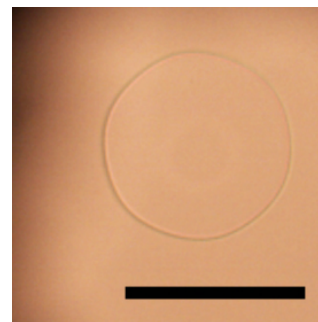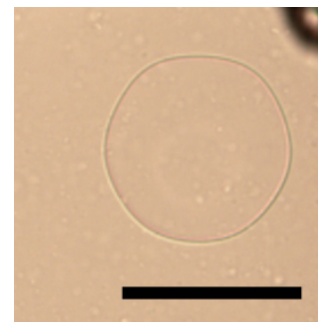

**5.0 mg/ml**

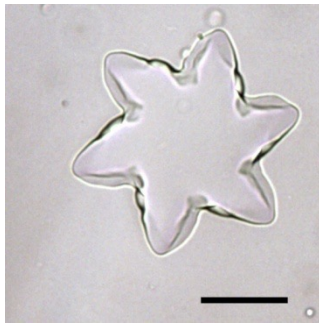

ChloroIBP

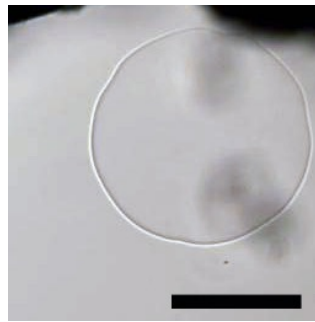

F160S

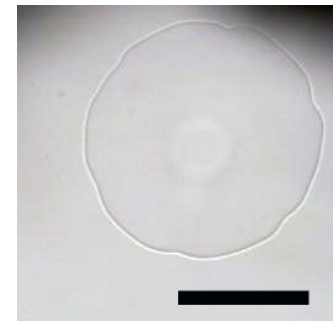

L226S
