# Supplementary material for: New Cysteine-Rich Ice-Binding Protein Secreted from Antarctic Microalga, Chloromonas sp
Source: PubMed Central journal article supplement (PMC4838330; doi:10.1371/journal.pone.0154056), 2016-04-20
Supplement: pone.0154056.s009.pdf [file pone.0154056.s009.pdf]

| Name of primers                                         | Sequences of primers (5'→3')      |
|---------------------------------------------------------|-----------------------------------|
| <b>IBP of green microalgae</b>                          |                                   |
| CCMP681_1_For                                           | ATGCCTAGCTCTTCAATGAAGC            |
| CCMP681_1_Rev                                           | TTAGTAGCACTCCCTGGGCC              |
| CCMP681_2_For                                           | ATGTCTACCACGAGCATAAAGT            |
| CCMP681_2_Rev                                           | TTAGTAACACTCGACTGGCC              |
| CCMP681_3_For                                           | ATGTCAGCAACAACCACCAC              |
| CCMP681_3_Rev                                           | TTAATAGAATAACGAGGCCCT             |
| C_vul_For                                               | ATGCAGGCCGCAGCCATGTC              |
| C_vul_Rev                                               | TTAGAGCTTGTTAGCCTCATTC            |
| <b>Inner primers to elucidate DNA sequences of gDNA</b> |                                   |
| gDNA_inner_For                                          | CCTAGCAACAACACCTTCA               |
| gDNA_inner_Rev                                          | AAGCCACACACTGTCCAA                |
| <b>Probe for Southern blot</b>                          |                                   |
| Southern_For                                            | GGCTCGAATCCAAGCATTTA              |
| Southern_Rev                                            | CATGGTCGCATGCTATTGTC              |
| <b>Probe for Northern blot</b>                          |                                   |
| Northern_For                                            | GTTGTGTGAAGATGGATGC               |
| Northern_Rev                                            | CGGAGGTTGTGAAATAGA                |
| <b>Expression of Chloromonas IBP</b>                    |                                   |
| Chloromoas_IBP_For                                      | CGCCGGATCCATGGCCATCGTTGTGTGCAAGAT |
| Chloromoas_IBP_Rev                                      | GCGGCTCGAGTTAGTAGCACTCCCTGGGCC    |
