# Supplementary material for: New Cysteine-Rich Ice-Binding Protein Secreted from Antarctic Microalga, Chloromonas sp
Source: PubMed Central journal article supplement (PMC4838330; doi:10.1371/journal.pone.0154056), 2016-04-20
Supplement: pone.0154056.s010.pdf [file pone.0154056.s010.pdf]

| Number of exons | Start and stop points of exons in genomic DNA |      | Length of exons | Number of introns | Length of introns | Splicing * signals |
|-----------------|-----------------------------------------------|------|-----------------|-------------------|-------------------|--------------------|
|                 | Start                                         | Stop |                 |                   |                   |                    |
| E01             | 1                                             | 128  | 128             | I01               | 126               | GT/AG              |
| E02             | 255                                           | 343  | 89              | I02               | 117               | GT/AG              |
| E03             | 461                                           | 576  | 116             | I03               | 217               | GT/AG              |
| E04             | 794                                           | 979  | 186             | I04               | 210               | GT/AG              |
| E05             | 1190                                          | 1278 | 89              | I05               | 215               | GT/AG              |
| E06             | 1494                                          | 1581 | 88              | I06               | 192               | GT/AG              |
| E07             | 1174                                          | 1821 | 48              | I07               | 198               | GT/AG              |
| E08             | 2020                                          | 2079 | 60              | I08               | 167               | GT/AG              |
| E09             | 2247                                          | 2281 | 35              | I09               | 123               | GT/AG              |
| E10             | 2405                                          | 2482 | 78              | I10               | 158               | GT/AG              |
| E11             | 2641                                          | 2766 | 126             | I11               | 436               | GT/AG              |
| E12             | 3203                                          | 3221 | 19              |                   |                   |                    |

\* Canonical splicing signal : GT/AG
