# Supplementary material for: New Cysteine-Rich Ice-Binding Protein Secreted from Antarctic Microalga, Chloromonas sp
Source: PubMed Central journal article supplement (PMC4838330; doi:10.1371/journal.pone.0154056), 2016-04-20
Supplement: pone.0154056.s011.pdf [file pone.0154056.s011.pdf]

| Structural elements | Total<br>with TRX (%) | TRX (%) | Total<br>without TRX (%) |
|---------------------|-----------------------|---------|--------------------------|
| $\alpha$ -helix     | 13                    | 31      | 7                        |
| Beta-strand         | 34                    | 23      | 38                       |
| Beta-turn           | 20                    | 19      | 20                       |
| Random coil         | 33                    | 27      | 35                       |
| Total               | 100                   | 100     | 100                      |
